# Supplementary material
Source: publisher site journal article supplement (https://www.dovepress.com/get_supplementary_file.php?f=181741TS1.xlsx)
Supplement: Supplementary file 1 [file get_supplementary_file.php]

## Sheet: 20180627D1001data2083.2预测值、临床、基
ID	OS	MONTH	ADAMTS9_AS1	LINC01697	RP11_319G6.3	RP11_116D2.1	LINC00844	RP11_21A7A.2	GAS1RR	FLG_AS1	RP11_598F7.5	RP11_7K24.3	LINC00365	LINC01497	RP11_148L24.1	RP11_863P13.3	LINC01354	RP11_307B6.3	RP11_742B18.1	HOXA10_AS	CTD_2540F13.2	RP11_64B16.4	RP11_720L2.4	RP11_161I6.2	RP11_332K15.1	RP11_308D13.3	RP11_88I18.3	RP11_429A20.3	HOXA11_AS	NCAM1_AS1	AC006007.1	LINC02086	CTA_126B4.7	CTD_2591A6.2	RP11_366F6.2	RP5_881L22.5	RP11_146E13.4	CCDC144NL_AS1	RP11_326C3.2	RP11_962G15.1	RP11_396O20.1	RP1_170O19.14	ZFPM2_AS1	RP11_161D15.1	BCAR4	RP11_766N7.3	POU6F2_AS2	RP11_332J15.4	RP11_8L2.1
TCGA-VQ-A8PX	0	64.52	0	0	1	0	0	0	0	0	1	1	1	0	0	0	0	0	0	0	1	1	1	0	1	0	0	0	0	1	0	0	1	0	0	0	0	0	0	1	0	0	0	0	1	1	0	0	0
TCGA-HF-7134	0	52.17	1	0	1	1	0	0	0	1	1	1	1	0	0	0	0	0	0	1	0	0	0	0	0	0	0	0	1	0	1	1	1	0	0	1	0	0	1	0	1	1	1	1	0	1	0	0	0
TCGA-HU-A4G9	0	24.18	0	0	1	1	1	0	0	0	0	1	1	1	0	0	0	0	0	1	0	0	0	0	0	0	0	0	1	0	1	1	0	0	0	1	0	0	1	0	0	1	0	0	0	1	0	0	0
TCGA-HU-8244	0	24.38	0	1	1	0	1	0	0	0	0	1	0	1	1	0	1	0	0	1	0	0	0	0	0	1	1	0	1	0	0	0	0	0	0	1	1	0	1	0	1	1	0	1	1	1	0	1	1
TCGA-BR-8486	0	20.2	0	0	1	1	0	1	0	0	1	1	0	0	0	0	0	1	0	0	0	0	0	0	1	0	0	0	0	1	0	1	0	0	0	1	0	1	1	1	1	1	1	0	1	0	1	0	0
TCGA-HU-A4GH	0	11.76	0	1	1	1	0	0	0	0	0	1	1	1	0	0	0	1	1	1	1	0	0	1	0	1	1	1	1	0	1	1	1	1	1	0	1	1	1	1	0	1	1	0	0	1	1	0	1
TCGA-CG-5726	1	28.94	0	1	0	1	1	0	0	0	1	0	1	1	0	0	0	0	0	1	1	0	0	0	1	1	0	1	1	0	1	0	0	0	1	1	1	1	0	1	1	1	0	0	0	0	0	0	0
TCGA-CG-4443	0	29.96	1	1	1	0	0	0	1	0	1	0	0	1	1	0	0	0	1	0	1	1	0	0	0	0	1	1	0	0	0	0	0	1	0	1	1	0	1	1	1	0	0	1	1	0	1	0	1
TCGA-IN-A6RI	0	18.36	0	1	0	0	0	0	0	1	1	1	1	0	0	0	0	0	1	1	1	0	1	1	0	0	0	1	1	1	0	0	1	1	1	1	1	0	0	1	1	1	1	0	1	1	0	0	1
TCGA-IN-AB1V	0	15.74	1	1	0	0	1	1	1	1	0	1	1	1	1	0	1	1	1	0	0	1	0	0	0	1	1	0	0	0	0	0	0	1	0	0	1	0	0	0	0	0	1	1	0	1	0	0	0
TCGA-IN-A6RS	0	12.58	1	0	0	0	0	0	0	0	1	1	1	0	0	0	0	0	1	0	1	1	0	0	0	1	0	0	0	0	0	1	0	0	0	1	0	0	1	0	1	0	1	0	0	0	0	0	0
TCGA-IN-A6RJ	0	12.45	1	1	0	1	1	1	1	1	0	1	0	1	1	0	0	0	0	0	0	1	1	1	0	1	0	1	0	1	1	0	0	1	1	0	0	0	0	1	1	0	0	0	0	0	1	0	0
TCGA-IN-A6RO	1	5.06	0	0	0	0	0	1	1	0	0	1	0	0	0	0	0	0	0	1	1	0	1	0	1	0	0	0	1	1	0	1	1	0	0	1	1	0	1	0	0	1	1	0	0	0	1	1	0
TCGA-VQ-A92D	0	66.75	1	0	1	1	1	1	0	1	1	1	1	0	1	1	0	0	0	0	1	1	0	1	1	1	0	0	0	1	0	1	0	0	0	1	0	0	1	0	1	1	0	0	0	0	0	1	0
TCGA-KB-A93G	0	20.14	1	0	0	0	1	0	1	1	1	0	1	0	1	1	0	1	1	1	0	1	1	0	1	0	1	0	1	0	0	0	0	1	0	1	1	0	0	1	0	0	1	0	0	1	1	0	1
TCGA-BR-8678	0	24.77	0	0	1	0	0	1	0	1	0	1	0	1	0	1	0	0	1	0	0	0	0	1	0	1	0	0	0	1	0	0	0	1	1	1	1	1	0	1	1	0	1	1	1	1	1	1	1
TCGA-BR-7707	0	35.81	0	0	0	1	1	1	1	0	1	1	0	1	0	1	1	0	0	1	1	0	0	0	0	0	0	1	1	0	1	1	0	1	1	0	0	0	1	1	1	1	0	0	0	1	1	1	0
TCGA-BR-8368	0	4.3	0	1	1	0	1	1	0	0	1	0	0	1	1	0	1	1	1	1	1	1	0	0	0	0	1	1	1	1	1	1	1	1	1	1	0	0	1	1	0	1	1	1	1	1	1	0	1
TCGA-BR-6710	0	8.97	1	1	1	1	1	1	1	1	0	1	1	1	1	0	1	1	0	0	0	0	1	0	0	1	1	1	0	1	1	0	0	1	1	0	0	1	0	1	1	0	0	0	0	0	1	0	0
TCGA-D7-A6F2	0	15.64	1	0	1	0	1	1	0	0	0	0	0	0	0	0	0	0	0	0	1	0	1	1	1	0	0	0	0	1	0	1	1	1	1	1	1	0	1	0	1	0	0	0	0	0	1	1	1
TCGA-CG-4436	0	7.98	0	0	1	1	1	0	0	0	1	0	1	1	0	0	0	0	1	0	0	0	0	0	0	1	0	0	0	0	1	1	1	0	0	1	1	0	1	1	0	0	0	0	0	0	1	1	0
TCGA-B7-5818	0	11.7	0	0	0	1	1	0	0	1	1	1	1	1	0	1	0	0	0	0	1	1	0	0	1	0	0	1	0	0	1	0	1	1	1	0	0	0	0	1	1	0	0	0	0	1	1	0	0
TCGA-CG-4466	0	18.96	0	1	0	0	1	0	0	0	0	0	0	1	0	0	0	0	1	0	1	1	1	1	0	1	1	1	1	0	0	0	0	1	0	1	1	0	0	1	0	1	1	1	1	1	1	1	1
TCGA-D7-6528	0	15.21	0	0	0	0	0	0	0	0	1	1	0	0	0	1	0	0	0	1	1	1	1	0	0	1	0	0	1	1	0	1	0	1	0	1	0	0	1	1	1	1	1	0	1	1	1	1	1
TCGA-D7-A6F0	0	22.27	0	0	1	1	0	1	0	0	0	0	0	0	0	0	0	0	1	0	1	0	0	1	1	1	0	1	1	0	0	1	0	1	0	1	0	1	1	1	0	1	0	1	1	0	1	0	1
TCGA-HJ-7597	1	26.45	0	0	1	0	1	0	0	0	0	0	0	1	1	1	1	1	1	1	0	0	1	0	0	1	1	1	1	1	1	1	1	1	1	0	1	0	0	1	1	1	0	1	1	1	1	1	1
TCGA-CG-5725	1	15.01	0	0	1	1	1	0	0	0	1	0	0	0	0	0	0	0	1	1	0	0	0	0	1	0	0	0	1	0	1	0	0	1	1	0	0	1	0	1	0	0	1	0	0	1	1	1	1
TCGA-F1-6874	0	14.45	1	0	1	0	1	1	0	0	1	0	1	1	1	1	0	0	0	0	0	1	1	0	1	1	0	0	0	0	0	0	1	1	1	0	1	1	1	1	0	0	0	1	1	1	1	1	1
TCGA-RD-A8N2	0	116.29	1	1	1	0	1	1	1	1	0	0	0	1	1	0	1	1	0	0	0	1	1	0	0	0	1	1	0	1	1	0	0	0	0	0	0	0	0	0	0	0	1	1	0	0	0	0	0
TCGA-F1-6875	1	72.17	1	0	1	0	0	1	0	0	1	0	1	0	0	1	0	0	1	1	1	1	0	0	0	0	0	0	1	1	0	1	0	1	1	0	0	1	1	1	1	0	1	0	1	1	0	1	1
TCGA-FP-8209	1	59.49	1	1	1	0	1	1	1	0	0	0	0	1	1	0	1	1	0	0	0	1	1	0	0	0	1	1	0	1	1	0	0	1	1	0	0	1	1	1	0	0	1	1	1	0	1	0	1
TCGA-D7-6822	0	12.32	0	0	1	0	0	1	0	0	1	0	0	0	1	0	0	1	1	0	0	1	0	1	0	0	0	1	0	0	0	1	0	0	1	0	1	0	0	0	1	0	0	1	0	1	1	1	0
TCGA-SW-A7EA	0	19.02	0	0	0	1	1	0	1	0	0	0	0	1	0	1	1	0	1	1	0	0	1	0	0	1	0	0	1	0	1	0	0	0	1	0	0	1	1	0	0	1	1	0	1	0	1	1	0
TCGA-3M-AB46	0	57.98	0	0	1	0	0	0	0	0	0	1	0	0	1	0	0	0	0	1	1	0	1	1	1	0	1	0	1	0	0	1	0	0	1	1	0	1	0	0	0	1	1	1	0	0	1	1	0
TCGA-VQ-A8DV	1	13.24	1	1	0	1	1	0	0	0	1	0	0	0	0	0	0	0	1	0	1	0	1	1	0	0	1	0	0	0	0	0	0	1	1	1	0	0	0	1	1	0	0	0	0	0	1	1	1
TCGA-HU-A4H5	0	23.78	0	0	1	0	0	1	0	0	1	0	0	0	0	0	0	0	1	0	1	0	0	0	0	1	0	1	0	0	0	0	0	1	1	1	1	0	1	1	1	0	0	0	0	0	1	1	0
TCGA-CG-4477	0	30.95	1	1	0	0	1	1	1	1	0	1	1	1	1	0	1	0	0	0	1	1	0	0	1	1	1	1	0	0	1	1	1	0	0	1	1	0	0	1	0	0	1	0	1	1	1	0	1
TCGA-D7-6522	0	18.59	0	1	0	1	1	1	1	1	1	0	0	1	1	1	1	1	0	0	0	0	0	0	1	0	0	0	0	1	1	1	1	0	1	0	0	1	0	0	1	1	1	0	0	0	0	0	0
TCGA-ZA-A8F6	0	17.25	1	1	1	0	0	1	1	1	0	0	0	0	1	0	1	1	0	1	0	1	1	0	0	0	1	1	0	1	1	1	1	0	0	1	0	0	1	1	0	1	0	1	0	0	1	1	0
TCGA-D7-8578	0	21.12	0	1	0	1	0	1	1	1	0	1	1	0	1	1	0	1	1	1	1	1	1	1	1	1	0	1	1	0	1	0	1	1	1	0	1	1	0	1	0	1	1	1	1	0	1	1	1
TCGA-RD-A7C1	1	16.66	1	1	1	1	1	0	1	1	1	0	1	1	1	1	1	0	1	1	0	1	1	1	1	1	1	1	0	1	1	0	0	1	1	0	1	1	0	1	1	0	1	1	1	1	1	1	1
TCGA-BR-4267	1	6.18	1	1	0	0	1	1	1	1	1	1	1	1	1	0	1	0	1	0	1	0	1	1	0	0	1	0	0	1	0	0	1	1	0	0	1	0	0	1	0	0	0	0	1	1	1	0	1
TCGA-RD-A7BW	1	5.12	1	1	0	1	1	1	1	1	1	0	0	1	1	1	1	1	1	0	0	1	1	1	1	1	1	1	0	1	1	0	0	1	1	0	0	1	0	1	1	0	1	1	1	1	1	1	1
TCGA-FP-7735	1	3.48	1	1	0	1	1	0	1	1	1	1	0	0	1	0	0	0	0	0	1	1	0	1	1	0	1	0	0	0	0	0	1	0	0	0	1	0	0	0	1	0	1	1	1	0	0	1	1
TCGA-HU-A4H8	0	14.06	0	0	1	0	0	0	0	0	0	1	1	0	0	0	0	0	0	1	1	1	0	0	0	1	0	0	1	1	0	1	0	1	0	0	0	0	1	0	0	1	1	0	0	1	0	0	0
TCGA-KB-A6F7	0	63.57	0	0	1	1	0	1	0	1	1	0	1	0	1	0	0	0	1	0	1	1	1	1	0	0	0	0	0	1	0	0	0	1	1	0	1	1	1	1	0	0	0	1	1	0	1	0	1
TCGA-F1-6177	1	6.66	0	0	0	1	0	1	0	0	0	1	0	0	0	1	0	0	1	1	0	0	1	0	0	1	1	1	1	1	1	1	1	0	0	1	0	0	1	1	0	1	0	0	1	0	0	0	0
TCGA-BR-6801	0	40.18	0	0	1	1	1	1	1	1	1	1	1	1	1	1	1	1	1	1	1	1	1	0	0	0	1	0	1	0	1	1	1	0	0	1	0	1	1	0	1	1	0	1	1	1	0	0	0
TCGA-HU-A4GT	0	6.5	0	0	1	1	1	0	0	0	1	1	0	0	0	0	0	0	1	1	0	0	0	0	1	1	1	0	1	0	1	1	1	0	0	1	0	0	1	0	0	1	0	0	0	1	1	1	1
TCGA-BR-8365	1	17.51	1	1	0	0	1	1	1	1	0	0	1	1	1	1	1	1	0	0	0	1	1	0	0	1	1	1	0	1	1	0	0	1	0	0	1	1	0	0	0	0	0	1	0	1	0	0	0
TCGA-CD-8533	0	15.37	0	1	1	1	0	1	0	1	0	0	1	1	0	0	0	0	1	1	0	0	0	1	0	1	1	1	0	1	0	1	0	1	1	1	1	1	1	1	1	1	0	0	1	1	1	1	1
TCGA-HU-A4GF	0	25.79	1	1	1	1	0	1	0	0	1	0	0	0	0	0	0	1	1	0	1	0	0	1	0	1	0	1	1	0	0	1	0	1	1	1	0	0	1	0	0	1	1	0	0	1	1	1	0
TCGA-BR-7704	0	35.22	0	0	0	0	0	1	0	1	1	0	0	0	0	1	0	0	0	0	1	1	0	1	0	0	0	0	0	0	0	0	1	1	1	1	1	0	1	0	1	0	0	0	0	1	0	0	0
TCGA-FP-8099	0	17.05	0	0	1	0	0	1	0	0	0	1	0	0	0	1	0	1	0	1	0	0	0	0	1	1	0	0	1	0	0	1	1	1	1	1	1	0	1	0	1	1	1	1	1	1	0	1	0
TCGA-BR-7197	0	9.2	1	0	1	0	0	1	0	0	0	0	1	0	1	0	1	1	1	0	0	1	0	1	0	0	1	1	1	1	1	0	1	1	1	0	0	1	1	1	1	0	1	1	0	0	1	0	0
TCGA-IN-AB1X	0	13.5	0	0	1	0	0	0	0	1	0	1	1	1	0	0	0	1	1	0	0	1	0	0	1	1	0	0	0	1	0	1	1	1	0	1	1	0	1	1	0	0	0	0	0	0	0	1	1
TCGA-CD-8524	0	12.75	1	1	0	0	1	1	0	1	1	1	0	0	1	1	1	1	1	1	1	0	0	1	1	0	0	0	1	0	0	1	0	1	1	0	0	1	1	1	1	1	1	1	1	1	0	1	1
TCGA-BR-6457	0	13.67	1	1	1	1	1	1	1	1	0	0	1	1	1	1	1	1	0	1	0	1	1	0	1	0	1	1	1	1	1	1	1	0	1	0	1	1	0	0	1	1	0	1	0	0	0	0	0
TCGA-CD-A4MH	0	12.19	0	1	1	1	0	0	0	0	0	0	0	0	0	0	0	0	0	1	1	0	0	1	1	0	0	0	0	1	0	1	0	0	1	1	0	1	1	1	0	0	1	0	0	1	1	1	1
TCGA-CD-8530	0	12.39	1	0	1	1	0	1	1	1	1	0	1	1	1	0	1	1	1	0	0	1	0	1	0	0	1	0	0	0	1	0	0	1	0	0	1	1	0	1	1	0	1	1	1	1	1	0	1
TCGA-CD-A48A	0	12.42	0	1	0	0	1	0	1	0	0	0	0	1	1	0	1	0	1	0	1	1	1	1	0	1	1	1	0	1	0	0	0	1	0	1	1	0	0	1	0	0	0	1	1	1	1	0	1
TCGA-BR-6452	0	34.66	0	0	0	1	0	0	0	0	1	1	1	0	0	1	0	0	0	1	1	0	0	1	1	1	0	0	1	1	1	1	1	0	0	1	0	1	0	0	0	1	1	0	1	0	0	0	0
TCGA-BR-8487	0	1.12	0	0	1	0	0	0	0	0	0	1	0	0	1	1	0	0	1	1	1	0	0	0	1	0	0	1	0	0	0	0	1	1	0	0	1	0	1	0	0	0	1	0	1	1	1	0	0
TCGA-VQ-A8PB	1	34.26	0	0	0	0	0	0	1	1	1	1	0	0	1	1	0	1	0	1	1	0	1	0	0	1	1	0	1	1	0	0	1	0	0	0	0	1	1	0	0	1	0	1	0	1	0	1	0
TCGA-BR-6566	0	32.75	0	0	0	1	1	0	1	0	0	0	0	1	0	1	0	0	1	1	0	0	0	0	1	1	0	1	1	0	1	1	1	0	1	0	0	1	1	0	1	1	0	0	0	0	0	1	0
TCGA-VQ-AA6G	1	26.02	1	0	0	0	0	0	0	0	1	1	1	0	0	0	0	0	0	1	0	1	0	0	0	1	1	0	1	0	0	1	0	1	0	1	0	0	1	1	0	1	1	1	0	0	1	1	0
TCGA-BR-6803	0	31.18	1	1	1	1	1	1	1	1	1	0	1	1	1	0	1	1	0	0	0	1	1	0	0	1	1	1	0	1	1	0	1	0	1	0	0	1	0	0	1	0	0	1	0	0	1	0	0
TCGA-BR-7715	0	33.61	1	0	1	1	1	1	1	0	1	0	0	1	0	1	1	1	1	0	0	0	0	1	1	0	0	0	0	1	1	1	1	1	1	1	1	1	0	0	1	0	1	0	0	0	1	1	0
TCGA-HU-8604	0	22.8	0	0	0	1	1	0	1	0	1	0	1	1	0	1	1	0	0	0	1	1	1	1	0	0	0	0	0	0	1	0	1	0	0	1	1	1	0	0	0	0	0	1	0	0	0	0	0
TCGA-BR-6852	0	44.91	1	1	0	1	0	0	1	0	1	1	0	0	0	1	1	0	0	1	0	1	0	1	0	1	0	1	1	1	1	1	1	1	0	0	0	0	1	0	0	1	0	0	1	1	1	1	1
TCGA-F1-A72C	0	11.37	1	1	0	1	0	1	0	1	1	1	1	0	0	1	1	0	1	1	1	0	1	1	1	0	1	0	0	0	1	0	0	0	0	1	1	0	1	0	0	1	0	1	1	1	1	1	0
TCGA-CD-5813	1	12.39	1	1	0	1	1	0	1	1	1	0	0	1	0	1	1	1	0	1	0	1	0	1	1	1	0	1	1	0	1	0	0	0	1	0	0	1	0	0	1	0	0	1	0	1	1	0	0
TCGA-VQ-A8E3	1	21.71	0	1	1	0	1	0	0	0	0	1	0	1	1	0	1	0	1	1	0	0	1	1	0	1	1	1	1	1	1	1	1	1	1	0	1	0	1	1	1	1	0	1	1	1	1	1	1
TCGA-CD-8534	0	12.06	0	1	1	0	0	1	1	0	0	1	0	0	1	0	0	1	0	1	0	1	1	0	0	0	1	1	0	1	0	1	1	1	0	0	0	0	0	0	0	1	0	1	1	1	1	1	0
TCGA-MX-A663	1	9.86	1	1	0	1	1	1	1	1	1	0	0	1	1	1	1	1	1	1	1	1	1	1	0	0	1	1	1	1	1	0	0	1	1	1	1	1	1	1	1	0	1	1	0	0	1	0	1
TCGA-CD-5800	0	13.14	0	0	0	1	0	1	0	1	1	0	0	0	0	1	0	0	1	0	1	1	0	1	1	1	1	0	1	1	0	0	0	1	1	1	1	1	1	1	1	0	1	1	1	0	1	0	1
TCGA-CD-5803	1	11.2	1	0	1	1	1	1	1	1	1	0	0	1	1	1	1	1	0	0	0	1	1	0	1	0	1	1	0	1	1	0	0	0	1	0	0	1	0	0	1	0	0	1	1	0	0	0	0
TCGA-BR-6707	1	19.88	0	0	1	1	1	0	0	1	1	0	0	1	1	0	1	1	0	0	0	0	1	0	1	0	0	1	0	0	1	0	1	0	1	1	0	0	0	0	1	0	0	0	1	0	0	1	0
TCGA-VQ-A924	1	55.39	1	0	0	1	1	0	1	1	0	1	0	1	1	1	0	1	0	1	0	0	0	0	0	1	1	1	1	1	1	1	1	0	0	1	1	1	1	0	1	1	0	1	1	0	0	1	0
TCGA-CD-5798	0	13.4	1	1	0	1	1	1	1	1	0	1	1	1	1	1	1	1	1	1	0	1	1	1	0	1	0	1	1	0	1	0	0	0	1	0	0	1	0	0	1	1	0	1	0	0	0	0	0
TCGA-D7-8573	0	19.48	0	1	0	1	0	1	0	1	1	1	1	1	1	0	0	0	1	0	1	0	0	0	0	1	1	1	0	1	0	0	0	0	0	0	1	0	0	1	1	0	0	1	1	1	1	0	1
TCGA-CD-A489	1	11.3	0	0	1	0	1	1	1	1	0	1	0	1	1	0	1	1	0	0	0	1	1	1	1	0	1	1	1	1	1	1	1	0	1	0	0	1	0	0	0	0	1	1	0	0	0	1	0
TCGA-BR-8286	0	29.4	0	1	0	0	1	0	0	0	1	0	1	1	1	0	1	0	0	1	1	0	1	0	1	1	1	1	1	0	0	0	1	1	0	0	0	0	0	1	1	1	1	1	1	1	1	1	1
TCGA-CD-A4MG	1	6.57	1	0	0	0	1	0	0	0	1	1	0	0	0	1	0	1	1	0	0	0	1	0	1	1	0	1	0	0	0	1	0	1	1	1	1	1	0	1	0	1	0	1	0	1	0	0	0
TCGA-VQ-A8P5	1	7.72	1	1	1	1	1	1	1	1	0	1	0	1	1	1	1	1	1	0	1	1	0	1	1	1	1	1	0	1	1	0	0	1	1	0	1	1	0	1	1	0	1	1	1	1	1	1	1
TCGA-CD-A486	1	6.31	0	1	0	1	0	1	0	1	1	0	0	0	0	1	0	1	1	0	1	1	1	1	1	0	0	1	0	1	0	0	0	1	1	0	0	1	1	1	1	0	1	0	1	0	1	0	1
TCGA-CD-8532	1	11.63	0	1	0	0	1	0	1	0	0	1	1	1	0	0	1	0	0	0	1	1	1	1	1	1	1	1	0	0	0	1	1	0	1	1	0	1	0	0	1	0	0	0	1	0	1	1	0
TCGA-BR-A44T	0	34.1	1	1	1	0	1	1	1	1	0	0	0	1	1	0	1	1	0	0	0	1	1	0	0	0	1	1	0	1	1	0	0	0	1	0	0	0	0	1	0	0	0	1	0	0	0	0	0
TCGA-BR-8682	0	32.56	1	1	0	0	0	1	1	1	0	0	0	1	1	0	1	1	0	1	0	0	1	0	0	0	1	1	0	1	1	1	0	0	1	1	0	0	1	0	0	0	1	1	0	0	0	0	0
TCGA-BR-7851	1	1	0	1	1	0	0	1	1	0	1	1	0	1	1	1	1	1	1	0	0	1	1	0	1	0	1	1	0	1	1	0	1	0	1	1	1	0	1	0	1	0	0	0	0	0	0	0	0
TCGA-BR-8081	0	32.23	1	1	1	0	0	1	1	1	1	1	0	0	1	1	1	0	1	1	0	1	1	0	1	0	1	1	1	0	0	1	1	0	1	0	1	1	1	1	1	0	0	0	0	0	0	0	0
TCGA-VQ-A94U	0	26.91	1	0	0	0	0	0	1	0	0	1	0	1	0	0	1	1	0	1	1	0	0	0	0	0	1	0	1	1	0	1	1	1	0	1	0	0	0	0	0	1	0	0	0	1	0	0	1
TCGA-VQ-A8P8	0	30.95	1	0	0	0	0	1	1	1	1	1	1	0	1	0	1	1	0	1	0	1	1	0	0	1	1	0	1	1	1	0	0	0	0	1	0	1	0	0	0	1	1	1	1	1	0	0	0
TCGA-BR-6565	1	9.17	1	0	0	1	0	1	1	1	0	1	0	0	1	1	1	1	1	1	0	1	1	1	0	0	1	0	1	1	1	1	0	1	0	1	1	1	1	1	1	1	0	0	1	0	1	0	0
TCGA-HU-8602	0	22.31	0	0	1	1	0	0	1	0	1	0	0	0	0	1	0	0	0	1	1	0	0	0	0	1	0	0	1	0	1	1	1	0	0	0	0	0	1	0	1	1	0	0	0	0	0	1	0
TCGA-BR-8588	0	12.78	1	1	0	1	0	1	1	0	0	1	1	0	0	1	1	1	0	0	0	0	0	0	1	1	1	0	1	1	1	1	1	0	1	1	0	1	1	0	0	1	1	0	1	1	0	0	1
TCGA-VQ-A8PO	1	9.26	1	0	0	0	0	0	0	1	1	1	0	0	0	1	0	0	0	1	0	0	0	0	0	0	0	0	1	1	0	1	1	0	0	0	1	1	1	0	0	1	0	0	0	0	0	1	1
TCGA-BR-8295	1	2.2	1	1	0	1	1	1	1	0	1	0	0	1	0	0	1	0	1	0	1	0	1	1	0	1	1	1	0	1	1	0	1	1	1	0	1	1	1	1	0	0	0	1	1	1	1	1	1
TCGA-HU-A4GP	0	8.97	1	1	0	0	0	0	0	0	1	1	1	0	1	0	0	0	1	1	1	0	0	0	0	1	1	1	1	0	0	1	0	0	0	1	1	0	1	1	0	1	1	1	1	1	1	0	1
TCGA-KB-A93J	0	36.93	0	1	1	0	0	0	0	0	1	1	1	0	0	1	0	0	1	0	0	0	0	0	1	1	0	0	0	1	0	1	1	0	0	0	0	0	0	1	1	1	0	0	0	1	0	0	0
TCGA-HF-7132	0	77.23	0	0	1	0	0	1	1	1	0	1	1	0	0	0	0	1	0	1	0	0	1	1	0	1	1	0	1	1	1	1	1	0	0	0	1	1	1	0	0	1	0	0	0	1	0	0	1
TCGA-CG-5723	0	104.99	1	1	0	1	1	0	1	1	0	0	0	1	1	1	0	1	1	1	0	0	0	1	0	1	0	1	0	0	1	1	1	1	1	0	1	0	1	0	1	0	0	0	0	1	1	0	1
TCGA-RD-A8N9	0	35.58	1	0	1	0	1	1	1	1	1	0	0	1	1	0	1	1	0	1	1	1	1	1	1	1	1	0	0	0	1	0	0	0	0	1	1	1	0	1	0	1	0	1	0	1	0	1	1
TCGA-BR-6453	0	15.93	1	1	1	1	1	0	1	1	0	0	0	1	0	0	1	0	0	1	0	0	1	0	0	0	1	0	1	0	1	1	0	0	0	1	0	1	0	0	0	1	0	0	0	1	0	1	0
TCGA-D7-6524	0	17.84	1	0	0	1	0	1	1	1	1	1	1	0	0	1	1	1	0	1	0	1	0	1	1	0	1	0	1	1	1	0	1	0	0	1	0	1	1	0	0	1	1	0	0	0	0	0	0
TCGA-CG-4437	0	8.05	0	0	1	1	1	1	1	0	1	1	1	1	1	1	0	0	0	1	0	0	0	0	1	0	0	1	1	0	1	0	1	0	1	0	1	0	0	0	1	1	0	0	0	0	0	0	0
TCGA-CG-5717	1	6.96	1	1	0	1	1	0	1	1	0	1	0	1	0	0	1	0	0	1	1	1	1	1	0	1	1	1	0	0	1	0	1	0	1	0	1	1	0	1	1	0	0	0	0	1	0	0	1
TCGA-IN-8462	0	18.79	1	1	0	0	0	1	1	1	0	1	1	1	0	0	1	0	1	1	0	1	1	1	1	1	1	1	1	1	0	1	0	0	1	0	0	0	1	0	0	0	1	1	1	1	0	0	1
TCGA-BR-4279	1	9.56	1	1	0	1	1	1	1	1	0	0	1	1	1	1	1	1	0	0	0	0	1	1	1	1	1	0	0	0	1	0	1	0	0	1	1	1	0	0	0	0	1	1	0	0	0	0	0
TCGA-CD-8527	1	7.16	0	0	0	0	1	0	0	0	0	1	1	1	1	0	0	1	1	1	1	1	0	0	1	1	1	1	0	0	0	1	0	1	1	0	0	1	0	1	1	1	1	0	0	0	1	0	1
TCGA-CD-5799	0	13.01	1	0	0	1	1	0	0	1	1	1	1	1	1	1	1	0	1	0	0	0	0	1	1	0	1	0	0	0	1	1	0	0	1	1	0	1	0	0	1	1	1	0	0	0	0	1	0
TCGA-CG-5718	1	35.97	1	1	0	1	0	1	0	0	1	1	0	0	0	1	0	1	1	0	1	0	0	0	0	1	1	0	1	0	1	0	0	1	1	0	0	1	1	0	0	1	1	0	0	0	1	0	0
TCGA-CG-4305	0	15.93	1	0	1	0	1	0	1	0	0	1	1	0	1	1	1	0	0	1	0	0	1	1	1	1	0	1	0	1	0	0	0	0	0	1	1	1	0	1	1	0	0	0	1	0	0	0	1
TCGA-D7-6527	1	10.25	0	1	1	1	1	0	0	1	1	0	0	1	0	1	0	0	0	0	1	0	0	1	0	0	0	0	0	1	1	0	0	1	1	0	0	1	0	1	1	0	1	0	1	1	0	0	1
TCGA-IN-7806	0	36.33	1	1	1	0	0	1	0	1	0	1	1	1	1	0	0	1	0	0	1	1	0	1	0	1	1	0	0	0	0	1	1	0	1	1	1	0	1	0	1	1	0	0	1	1	0	0	0
TCGA-KB-A93H	0	37.61	0	0	1	0	0	1	0	0	0	0	1	0	0	0	0	1	1	1	1	0	0	1	0	1	1	0	1	0	0	1	0	1	1	1	0	0	0	1	0	1	1	0	1	1	1	0	1
TCGA-BR-6563	0	39.09	1	1	1	0	1	1	1	1	0	0	0	0	1	1	1	1	0	0	0	1	1	0	1	0	1	1	0	1	1	1	1	0	0	1	1	1	0	0	0	1	1	1	0	0	0	0	0
TCGA-EQ-8122	1	7.98	1	1	1	0	0	1	1	1	1	1	0	1	1	1	1	1	1	1	1	1	1	1	0	1	1	1	1	1	1	0	0	1	1	1	1	0	0	1	0	1	1	1	0	0	1	1	0
TCGA-BR-7716	0	39.75	0	1	1	1	1	1	0	1	0	1	1	0	1	1	1	1	1	1	1	0	1	1	1	0	0	0	1	1	1	1	1	1	1	1	0	1	1	1	1	1	1	0	0	0	1	0	1
TCGA-VQ-AA6F	0	54.07	1	1	0	0	0	0	0	1	1	1	0	0	0	0	0	1	0	0	1	0	1	1	1	0	0	0	0	0	0	1	1	1	1	1	1	0	0	0	1	0	1	0	0	1	1	0	0
TCGA-CD-A487	0	12.29	0	1	0	0	0	1	1	1	0	0	0	0	1	1	1	1	0	1	0	0	1	1	1	0	1	1	1	1	0	1	0	1	1	1	0	0	1	1	0	1	1	1	1	1	1	0	1
TCGA-HU-A4G8	0	22.67	0	0	0	0	0	1	0	0	1	1	1	1	1	1	0	0	1	1	0	1	0	1	0	1	0	0	1	0	0	0	0	0	1	0	1	0	1	1	0	1	0	0	0	1	0	0	1
TCGA-CD-A48C	1	11.6	1	1	0	0	0	0	1	1	0	1	1	0	1	1	1	1	1	1	1	0	1	1	1	1	0	1	1	0	0	0	0	1	0	1	0	1	0	1	1	1	1	1	0	1	0	1	1
TCGA-CG-4475	0	22.96	1	1	1	1	0	0	1	1	1	1	0	1	1	1	1	1	1	0	1	1	0	1	0	0	1	0	0	1	0	0	0	1	1	0	1	1	0	0	0	0	1	0	0	1	1	0	1
TCGA-BR-8381	0	7.36	1	1	1	0	1	0	0	0	0	0	0	1	1	1	1	0	0	0	1	0	0	1	1	1	0	1	0	1	1	0	1	1	0	0	1	1	1	0	0	0	0	1	1	1	1	1	1
TCGA-HU-A4GD	0	22.73	0	1	1	1	1	0	0	0	0	0	0	1	1	0	1	0	1	0	1	0	1	1	0	1	1	1	1	1	0	1	1	1	1	1	1	0	0	1	1	1	1	1	1	1	1	1	1
TCGA-D7-A4YX	0	36.4	0	1	0	0	0	0	0	0	1	1	0	0	0	0	0	0	0	0	0	0	0	0	0	1	0	0	0	1	0	0	0	0	0	0	0	0	0	0	0	0	0	0	0	0	0	0	1
TCGA-BR-7722	1	15.31	0	1	1	0	0	1	0	0	0	1	1	0	0	0	0	1	0	0	0	1	1	1	1	0	0	0	0	0	1	1	1	0	0	1	0	0	1	1	1	0	0	1	0	0	0	0	1
TCGA-HU-A4GU	0	6.57	0	0	0	0	1	0	0	0	0	0	1	0	0	1	0	0	1	1	0	0	0	1	0	1	0	0	1	0	0	1	1	0	0	1	0	0	1	0	0	1	0	0	1	0	0	0	0
TCGA-HU-A4G2	0	24.28	0	0	0	0	0	0	0	0	1	1	1	0	0	0	0	0	0	0	0	0	0	0	0	1	0	1	0	0	1	0	1	0	0	0	0	0	0	0	0	0	1	1	0	1	0	1	0
TCGA-D7-A747	1	8.38	1	1	1	1	0	1	1	1	0	0	0	1	1	0	1	1	1	0	0	1	1	1	1	1	1	1	0	1	1	1	0	1	1	1	1	1	1	1	1	0	1	1	1	1	1	1	1
TCGA-BR-8291	1	19.94	1	1	1	0	0	1	1	1	0	1	1	1	0	1	1	1	0	0	0	1	1	0	1	0	1	1	0	0	0	0	1	0	0	1	1	1	0	1	0	0	1	0	1	1	0	1	1
TCGA-BR-6458	1	19.32	1	1	1	0	1	1	1	0	1	1	1	0	0	1	1	0	1	1	1	1	1	1	0	0	0	0	1	0	0	0	1	0	1	0	1	1	1	1	1	1	1	0	0	0	0	1	1
TCGA-BR-6455	1	13.86	1	1	0	1	0	1	1	0	0	0	0	0	1	1	1	0	0	0	1	1	1	1	1	1	1	0	0	1	1	0	0	0	0	0	1	1	0	0	1	0	0	1	0	0	0	0	0
TCGA-IN-A7NT	0	10.61	0	0	0	1	1	0	0	0	0	0	0	1	0	1	0	0	0	0	1	0	0	0	0	1	0	0	0	0	1	0	0	1	1	0	1	0	1	0	0	0	0	0	1	0	0	1	1
TCGA-FP-8211	0	13.57	0	1	1	0	0	0	0	0	0	1	1	0	0	0	1	0	0	1	1	0	0	0	1	0	1	0	0	0	0	0	1	0	0	0	0	0	0	0	0	0	0	0	1	0	1	1	0
TCGA-FP-7829	0	19.51	0	0	0	1	1	0	0	1	1	0	1	1	0	1	0	0	1	1	1	0	0	1	1	0	1	1	1	0	1	1	0	1	1	1	1	1	1	1	1	1	0	1	0	0	1	0	1
TCGA-BR-7901	1	3.45	1	1	0	1	1	1	1	1	1	0	1	0	1	1	1	1	1	1	1	1	0	1	1	1	0	0	0	0	1	1	0	1	1	0	1	1	0	1	1	1	1	1	1	1	1	0	1
TCGA-BR-6456	1	17.28	1	0	0	1	1	1	1	1	1	0	0	0	1	1	1	1	1	0	0	1	0	1	1	0	1	0	0	1	1	1	1	0	1	1	0	1	0	1	1	1	1	1	0	0	1	1	0
TCGA-IN-A6RN	0	19.51	1	1	1	1	1	0	0	0	0	1	1	1	0	0	0	0	1	1	0	1	0	0	1	0	0	1	0	1	1	1	0	1	1	0	1	1	0	1	1	0	1	0	1	1	0	1	0
TCGA-D7-6815	0	15.97	1	1	1	1	1	0	1	0	0	0	1	0	0	1	1	0	1	0	0	0	1	1	1	0	0	1	0	0	0	1	1	0	0	1	1	1	1	0	1	0	0	0	1	0	1	0	0
TCGA-HU-A4H4	0	23.82	1	0	0	0	0	1	0	0	1	1	0	0	0	1	0	0	0	1	0	0	1	1	0	0	0	0	1	0	0	1	1	0	1	1	0	0	1	0	0	1	0	0	0	0	0	0	0
TCGA-D7-A4Z0	0	14.75	1	0	1	1	0	0	1	1	1	1	1	0	0	0	1	1	0	1	0	1	0	0	0	0	1	0	1	1	1	1	1	0	0	1	1	1	0	0	0	1	1	0	1	0	0	0	0
TCGA-D7-A6EV	0	11.24	0	0	1	0	0	1	0	0	1	1	1	0	0	1	0	0	1	1	1	1	0	0	0	1	0	0	1	1	0	1	1	0	0	1	1	0	1	0	0	1	1	0	0	0	1	1	1
TCGA-D7-8572	0	16.79	1	1	0	1	1	0	1	0	1	0	0	1	1	1	1	1	1	1	1	1	1	1	1	1	1	1	0	1	1	1	1	1	1	1	1	1	1	1	1	1	0	1	1	1	1	1	1
TCGA-BR-8060	1	11.43	1	1	1	0	1	1	1	1	0	0	0	1	1	1	0	1	1	0	0	1	1	1	0	1	1	1	0	0	1	1	0	1	1	0	1	0	0	1	1	0	0	1	1	1	1	0	1
TCGA-HU-A4G3	0	5.58	1	1	1	1	0	0	0	1	1	1	1	0	0	0	0	0	0	0	1	0	0	0	1	1	1	0	0	0	0	0	0	0	0	0	0	0	0	0	1	0	1	0	0	1	0	0	0
TCGA-IN-8663	1	3.38	0	0	1	0	0	1	0	1	0	1	0	0	1	1	1	0	0	1	1	1	1	1	0	1	0	0	1	0	0	0	0	0	0	0	1	0	1	0	0	0	1	0	0	0	0	1	0
TCGA-HU-A4HB	1	15.67	0	0	1	1	0	1	0	1	0	0	1	0	0	0	0	1	1	0	0	1	1	1	0	1	0	0	1	0	1	0	0	1	1	0	1	0	0	0	1	1	1	1	0	0	1	0	1
TCGA-D7-8579	0	20.89	1	1	1	1	0	1	1	1	0	1	0	1	1	0	1	1	0	1	0	1	1	0	1	0	1	1	1	1	1	1	0	1	0	0	0	0	1	0	0	1	0	1	0	0	1	1	0
TCGA-MX-A666	0	14.03	0	1	1	1	0	1	0	0	1	0	0	0	1	0	0	1	1	1	1	0	1	1	0	0	1	1	1	1	0	0	0	1	1	1	0	1	1	1	0	1	1	0	0	1	1	0	1
TCGA-B7-A5TJ	0	11.01	0	0	1	0	1	0	0	0	1	0	1	1	0	0	1	1	0	1	0	0	1	0	0	0	0	0	1	0	0	1	1	0	0	1	0	1	1	0	0	1	0	1	1	0	0	1	0
TCGA-B7-A5TN	0	9.43	0	0	0	0	0	0	1	1	0	1	1	0	0	1	1	0	1	1	1	0	0	1	1	1	0	0	1	0	0	1	1	1	1	1	1	1	1	0	1	1	1	1	1	1	1	1	0
TCGA-BR-A4J7	0	32.49	1	1	1	0	0	1	1	1	0	0	0	1	1	0	1	1	0	1	1	1	1	0	0	0	1	1	0	0	1	0	0	0	0	0	0	1	1	0	0	1	1	1	0	1	0	1	0
TCGA-FP-A9TM	0	6.21	0	0	0	0	0	1	0	0	0	1	1	0	1	0	0	0	1	1	1	1	0	0	1	1	0	0	1	1	0	0	0	0	0	1	1	0	1	1	1	1	1	1	0	1	1	1	1
TCGA-D7-6519	0	20.53	0	1	1	0	1	1	0	1	0	1	0	0	0	1	1	1	0	1	1	1	1	1	1	1	0	0	1	0	0	1	0	0	0	1	0	0	0	0	0	0	1	0	1	1	0	0	0
TCGA-IN-A6RL	1	13.34	1	1	0	1	1	1	1	0	0	1	1	1	0	0	1	0	1	0	1	0	0	1	1	1	1	0	0	1	1	1	0	1	1	0	1	0	1	1	0	0	1	1	1	1	1	1	1
TCGA-CD-5804	0	12.09	1	1	0	1	1	1	1	1	1	1	1	0	1	1	1	1	1	0	1	1	1	1	1	0	0	0	0	0	1	0	0	0	0	0	0	1	1	0	1	0	1	1	1	0	0	0	0
TCGA-IN-A6RR	1	6.73	1	1	1	1	0	0	1	1	0	1	1	1	1	0	1	0	1	1	1	1	1	1	1	1	0	1	0	1	0	0	0	1	1	0	1	0	0	0	1	0	1	1	1	1	1	1	1
TCGA-BR-4256	1	9.33	1	1	0	0	0	0	1	1	1	0	0	1	1	1	1	1	1	1	0	1	0	0	0	1	1	1	1	0	1	0	0	0	0	0	1	1	0	1	0	1	1	1	1	0	0	0	0
TCGA-BR-4191	1	18.33	1	1	0	1	1	1	1	1	1	0	1	1	1	0	1	0	1	0	1	0	0	1	1	1	1	1	0	1	1	0	1	1	0	0	1	1	0	1	0	0	1	0	1	1	1	1	1
TCGA-HU-8238	0	1.51	1	1	1	1	1	0	1	0	0	1	1	1	0	0	0	0	0	1	1	0	0	0	0	0	1	1	1	1	0	0	1	0	0	1	1	0	0	1	0	1	0	0	1	0	0	0	1
TCGA-D7-6521	0	18.53	1	1	0	1	1	0	1	0	1	1	1	0	0	1	1	0	1	1	1	0	0	1	1	0	0	0	1	0	1	0	1	0	0	1	1	1	0	0	1	0	1	0	0	0	0	1	0
TCGA-VQ-A94R	1	42.51	0	0	1	0	0	0	0	0	0	1	0	0	0	0	1	1	0	1	0	0	0	0	0	0	1	1	1	0	1	1	0	1	1	1	1	1	0	1	1	1	0	1	0	1	0	0	1
TCGA-IN-7808	1	3.45	1	0	1	0	0	0	1	1	0	1	0	0	0	0	1	0	1	0	1	1	1	1	0	0	1	0	1	1	0	0	1	1	1	0	1	0	1	1	0	0	0	1	0	0	1	0	1
TCGA-BR-4201	1	30.88	1	1	0	0	1	0	1	1	0	1	0	0	1	1	1	1	1	1	0	1	1	1	1	0	1	0	1	1	0	0	0	0	0	1	1	1	0	1	1	1	0	0	0	0	1	1	0
TCGA-VQ-A94P	1	2.66	1	1	0	1	1	1	1	1	1	0	0	1	1	0	1	1	0	0	0	1	1	0	1	0	1	1	0	1	1	0	0	0	0	0	0	1	0	0	0	0	0	1	0	0	0	0	0
TCGA-BR-4257	1	9.66	0	0	0	1	1	0	1	1	1	1	1	1	0	1	0	0	1	1	1	0	0	1	1	1	0	1	1	0	1	0	1	0	1	1	0	1	0	0	1	1	1	0	1	0	0	1	0
TCGA-BR-4187	1	4.63	1	1	0	0	0	1	1	1	1	0	0	1	1	1	1	1	0	0	0	1	1	0	1	1	1	1	0	1	1	0	0	0	0	0	0	0	0	1	1	0	1	1	1	0	1	0	1
TCGA-CD-8528	0	12.32	0	0	1	1	1	0	0	0	0	0	1	0	0	1	0	0	0	1	1	0	1	1	1	1	0	0	1	0	1	0	0	0	0	1	0	0	1	1	0	1	0	0	1	0	1	1	0
TCGA-VQ-A91E	0	21.81	0	0	0	0	0	0	0	0	0	0	1	0	0	0	0	0	0	1	1	0	0	0	0	1	0	0	1	0	0	0	0	0	1	1	0	0	1	1	0	1	0	0	1	1	0	1	0
TCGA-BR-7958	0	29.53	0	0	0	1	1	0	1	0	1	1	0	1	0	1	1	0	0	0	1	0	0	1	1	0	1	1	0	0	1	0	1	0	1	0	1	0	1	1	1	0	0	0	0	0	0	0	0
TCGA-BR-4280	1	6.6	0	0	0	1	0	0	0	0	1	0	1	0	0	1	0	0	0	0	0	0	1	0	1	0	1	1	1	0	1	1	1	0	0	1	0	0	1	0	0	1	0	0	1	0	0	0	0
TCGA-VQ-A91K	0	61.17	0	0	0	1	0	0	0	0	1	1	1	0	1	1	1	1	0	1	1	1	1	0	0	1	1	1	1	1	0	1	1	0	0	1	0	0	1	0	0	1	0	0	0	1	0	1	0
TCGA-VQ-A923	1	2	0	1	0	0	0	0	0	1	1	0	1	0	0	0	0	1	0	0	1	1	0	0	0	1	1	1	0	1	0	0	1	0	0	1	1	0	0	0	1	0	0	0	0	1	1	1	0
TCGA-VQ-A91Z	0	55.52	0	0	1	0	1	0	0	1	0	0	1	0	0	0	0	1	1	0	1	0	0	1	0	0	0	1	0	0	0	0	0	1	1	1	1	0	0	1	1	0	0	1	0	1	1	1	1
TCGA-CD-8535	0	12.81	1	1	1	0	0	0	1	1	0	1	1	1	1	1	0	1	1	0	1	0	1	1	0	1	1	0	1	1	0	1	1	1	0	0	0	0	1	1	1	0	1	1	0	1	1	1	1
TCGA-RD-A8N4	0	71.32	1	1	1	0	1	1	1	1	0	0	0	1	1	0	1	1	0	0	0	1	1	0	0	0	1	1	0	1	1	0	1	1	0	0	0	1	0	0	1	0	1	1	0	0	0	0	1
TCGA-CD-5801	1	13.17	0	0	0	1	1	0	1	0	1	0	0	1	1	1	0	0	0	0	0	0	0	0	1	1	0	0	0	0	1	0	0	0	1	0	0	0	0	0	1	0	0	0	0	0	0	1	0
TCGA-CD-8531	0	12.58	0	1	0	0	0	0	0	0	0	0	0	0	1	1	0	0	0	0	0	0	0	0	0	0	0	0	0	1	0	0	1	0	0	0	0	1	0	0	0	0	0	0	0	0	0	0	0
TCGA-VQ-A8PC	1	46.22	0	0	0	0	1	0	0	1	0	0	1	1	0	0	1	1	0	0	0	1	1	1	0	1	1	0	1	0	1	0	1	1	0	1	0	0	1	0	1	1	1	0	0	1	1	1	1
TCGA-RD-A8NB	1	16.85	1	1	0	0	1	1	1	1	0	1	0	1	1	1	1	1	0	1	0	1	1	0	0	1	1	1	1	1	1	1	1	0	1	0	0	0	1	0	0	1	0	1	0	1	0	1	0
TCGA-CG-5734	1	7.98	1	0	0	1	1	0	0	1	1	0	1	1	0	1	0	0	0	0	0	0	0	0	0	1	0	1	1	0	1	0	0	1	1	0	0	0	1	1	1	0	1	0	0	0	1	0	0
TCGA-FP-8210	1	5.03	1	1	1	0	1	1	1	1	0	0	1	1	1	0	1	1	0	0	0	1	1	0	1	0	1	1	0	1	1	0	1	0	1	0	1	1	0	0	1	0	0	1	0	0	1	0	0
TCGA-RD-A8N5	1	57.39	1	0	0	1	0	1	1	0	1	0	1	0	0	1	0	0	1	0	1	1	0	1	1	1	1	0	0	1	0	0	1	0	1	0	0	1	0	1	0	0	1	0	1	1	0	1	1
TCGA-RD-A7BS	1	11.04	1	1	0	1	1	1	1	1	0	0	1	1	1	0	1	1	1	0	0	1	1	1	1	1	1	1	0	1	1	0	0	1	1	0	1	1	0	1	1	0	1	1	1	1	1	0	1
TCGA-CD-8525	0	12.58	0	1	0	0	0	0	1	0	1	1	0	0	0	1	0	0	1	1	1	1	1	0	1	1	0	0	1	1	0	1	1	0	1	0	1	0	0	1	0	0	1	0	1	1	1	1	1
TCGA-BR-4253	1	4.07	1	1	0	1	0	0	0	0	1	1	0	1	0	0	0	0	0	0	1	1	0	0	0	1	0	0	0	0	1	0	1	0	0	0	1	0	0	0	0	0	0	0	0	0	0	0	0
TCGA-MX-A5UG	1	3.71	1	0	1	1	1	1	1	1	1	0	0	0	0	1	1	1	0	0	0	1	1	0	1	0	1	1	0	1	0	1	1	1	0	0	1	1	1	0	1	1	1	0	1	0	1	1	0
TCGA-VQ-A91U	1	1.71	1	0	0	1	1	1	0	0	1	0	1	1	0	0	0	0	1	1	0	0	0	1	0	1	0	1	1	0	1	0	0	0	1	1	0	0	1	0	1	1	0	0	1	0	1	0	1
TCGA-CD-8526	0	12.52	0	0	0	0	0	1	0	0	1	0	0	1	1	0	1	1	1	1	1	0	1	1	0	0	1	1	0	1	0	1	0	1	1	0	1	1	1	1	1	0	1	1	1	1	1	0	1
TCGA-BR-7959	0	33.18	1	0	0	0	0	0	1	0	0	1	1	1	1	1	1	1	1	1	0	1	1	1	1	0	1	1	1	0	0	1	1	1	0	1	1	1	1	1	0	0	0	1	1	1	1	0	0
TCGA-BR-8373	0	14.78	1	0	1	1	0	0	1	1	0	1	0	0	0	0	1	0	1	1	1	1	0	1	1	0	0	1	1	1	0	1	1	1	1	1	1	1	1	1	0	1	1	1	0	1	1	1	1
TCGA-VQ-A8P2	0	38.11	0	0	0	1	1	1	0	0	1	1	1	1	0	0	0	0	0	1	1	0	0	0	0	0	0	0	1	0	1	1	1	0	0	1	0	0	1	0	1	1	0	0	1	1	0	0	0
TCGA-VQ-A8PU	1	27.33	0	0	1	1	1	1	0	0	1	1	1	0	0	0	0	0	0	1	1	0	0	1	0	1	0	0	0	0	1	1	0	0	1	0	0	0	0	0	1	0	0	0	1	0	0	0	0
TCGA-BR-8589	0	27.1	1	1	0	1	1	0	0	0	0	0	0	1	1	0	0	0	0	0	0	0	0	0	1	1	1	1	0	0	1	0	1	0	0	0	1	0	0	0	1	0	0	1	1	1	0	0	1
TCGA-BR-8059	1	14.42	1	0	0	1	0	0	1	0	1	1	0	1	1	1	1	1	1	0	0	0	0	1	1	1	0	0	0	0	1	0	0	1	0	0	0	1	0	0	0	0	1	1	0	0	0	0	1
TCGA-VQ-A91S	0	32.85	0	0	1	0	1	0	0	0	1	1	0	0	0	0	0	0	0	1	1	0	0	1	0	0	1	0	0	0	0	1	0	1	0	1	1	0	0	1	0	0	0	0	0	0	0	1	0
TCGA-BR-8686	1	20.86	1	1	0	0	0	1	1	1	0	0	0	1	1	0	1	1	1	0	0	1	1	0	0	0	1	1	0	0	0	0	0	0	0	0	0	0	0	0	0	0	0	1	1	1	0	0	0
TCGA-BR-8484	1	25.16	0	0	0	0	0	1	0	0	0	0	1	0	1	0	1	0	0	0	0	1	0	0	1	0	1	0	0	0	0	0	1	0	0	1	1	1	0	1	1	0	0	0	0	1	0	1	0
TCGA-BR-8592	1	6.27	1	1	1	1	1	1	1	0	0	0	0	1	1	0	1	1	0	0	0	1	1	0	1	0	1	1	0	1	1	1	0	0	0	0	1	1	0	1	1	0	1	1	0	0	0	0	1
TCGA-VQ-A8P3	0	37.19	1	1	0	0	1	0	1	0	1	0	0	1	1	1	1	1	1	1	1	1	1	0	1	0	1	1	0	0	0	1	1	0	0	1	1	0	1	0	0	0	0	0	1	1	0	1	0
TCGA-VQ-AA6D	0	17.12	0	1	0	1	0	0	0	0	1	0	1	0	0	0	0	0	1	1	1	0	1	1	0	1	1	0	1	1	0	0	1	1	1	1	1	0	0	1	0	1	1	0	1	1	1	1	1
TCGA-BR-A4J5	0	28.32	1	1	0	0	0	1	1	1	1	1	0	1	1	1	1	1	0	0	1	0	1	0	1	0	1	1	1	0	1	1	0	1	0	1	0	1	0	0	1	1	1	1	1	0	0	0	0
TCGA-B7-A5TK	0	9.46	0	0	0	1	0	0	1	1	0	0	0	0	1	1	1	1	0	0	0	0	1	0	0	1	0	0	0	0	0	1	1	0	1	0	0	1	0	0	0	0	0	1	0	0	0	0	0
TCGA-CG-4444	0	47.01	0	0	0	1	0	0	0	0	0	0	1	0	0	0	0	1	1	0	1	0	0	0	1	0	0	0	1	0	0	1	0	0	0	1	1	1	0	0	0	0	0	0	0	0	1	0	1
TCGA-D7-6520	0	18.82	0	0	1	1	1	1	0	1	0	0	1	0	0	1	1	0	1	1	1	0	0	1	0	0	0	1	1	0	1	1	0	1	1	0	0	1	1	1	1	1	1	1	1	1	1	1	1
TCGA-CG-4441	1	13.99	0	0	0	0	1	1	1	0	1	0	0	0	0	1	0	1	0	0	1	0	0	1	1	1	0	0	0	0	0	1	1	0	0	1	1	1	0	0	1	1	0	1	1	0	0	0	0
TCGA-D7-6525	1	13.34	0	1	1	1	1	1	1	1	0	0	0	1	1	1	0	1	1	1	1	1	1	1	0	1	0	0	0	1	1	1	0	0	0	0	1	1	1	0	0	0	1	1	1	1	1	1	0
TCGA-RD-A8N6	1	8.94	0	1	0	1	1	1	1	0	0	0	1	1	1	0	1	1	1	1	1	1	1	1	0	0	1	1	1	1	1	1	1	1	1	1	1	1	1	1	1	1	0	1	0	1	1	1	1
TCGA-RD-A8MV	0	122.21	0	0	1	1	0	0	0	1	0	1	1	0	0	0	0	0	0	0	1	0	0	0	0	0	0	0	1	1	0	1	1	0	1	1	1	0	1	0	0	1	0	0	0	1	0	0	1
TCGA-D7-A74A	0	19.94	0	0	1	1	0	1	1	0	0	1	1	0	0	0	0	0	0	0	0	1	0	1	1	1	0	0	0	0	1	1	1	1	0	1	0	0	1	0	0	1	0	0	0	1	0	1	1
TCGA-D7-A6EX	0	11.3	0	0	0	0	0	0	1	0	0	0	0	0	1	1	1	1	0	1	0	0	0	1	0	0	0	0	1	0	1	1	1	1	1	1	0	0	1	0	0	1	0	1	0	1	0	1	0
TCGA-IP-7968	0	2.53	1	0	1	0	0	1	0	0	1	0	1	0	0	0	0	0	1	0	1	0	0	1	1	1	0	0	1	0	0	1	0	1	0	1	1	0	0	0	0	0	1	0	1	0	0	0	1
TCGA-D7-5578	0	12.65	0	0	1	1	1	0	0	0	1	0	1	1	0	0	0	0	1	1	0	0	0	1	1	1	0	0	1	0	1	1	1	1	1	1	1	1	1	1	1	1	1	0	0	0	0	0	0
TCGA-BR-6564	1	26.08	1	1	1	1	1	1	1	0	0	1	0	1	1	1	1	1	0	0	0	1	0	0	0	0	1	1	0	1	1	0	0	0	1	0	0	1	0	0	1	0	0	1	1	1	0	0	1
TCGA-FP-A4BF	1	5.52	1	1	0	0	1	0	1	1	1	0	0	0	0	1	1	0	1	0	1	0	0	1	1	1	0	1	1	0	0	0	0	0	1	1	0	1	0	1	0	1	0	1	1	1	1	0	0
TCGA-BR-8483	0	5.39	1	1	0	0	0	1	0	0	0	0	0	0	0	1	1	1	0	0	1	0	1	0	0	0	0	0	0	1	0	1	1	0	1	1	1	1	1	0	0	1	0	1	1	0	0	1	0
TCGA-3M-AB47	1	12.98	1	0	1	0	1	0	1	1	1	0	0	0	1	0	1	1	0	0	0	1	1	0	1	1	1	1	1	1	0	1	0	0	0	1	0	1	0	0	0	1	0	1	0	1	0	0	1
TCGA-VQ-A91V	0	42.61	0	0	1	0	1	0	0	0	0	1	1	0	0	0	0	0	0	1	1	0	0	0	0	1	0	0	1	0	0	1	1	0	0	0	0	0	0	0	1	1	1	0	1	1	0	1	0
TCGA-HU-8249	0	28.94	0	1	0	1	1	0	0	0	1	0	0	1	1	1	0	0	0	1	0	0	1	1	0	1	1	1	1	0	0	1	1	1	1	1	1	0	0	1	1	1	1	1	1	1	1	0	1
TCGA-RD-A8N1	0	115.6	0	0	1	0	0	0	1	0	0	1	1	0	0	0	0	0	1	1	1	1	1	0	0	0	1	0	1	0	0	0	0	0	1	0	0	0	0	0	1	1	1	0	1	1	1	1	1
TCGA-MX-A5UJ	0	19.71	1	1	0	1	0	0	1	1	0	1	1	0	0	1	1	1	0	1	0	1	1	0	1	0	1	1	1	1	0	1	1	0	0	0	1	0	0	1	0	1	0	1	1	1	0	0	0
TCGA-VQ-AA69	0	28.38	0	0	0	0	0	0	0	0	0	1	0	1	0	0	0	0	0	0	1	1	0	0	0	0	0	0	0	1	0	0	1	0	0	0	0	0	0	0	1	0	0	1	0	1	1	0	0
TCGA-D7-A6EZ	1	20.3	1	0	1	0	0	0	1	1	1	0	0	1	0	1	0	0	0	0	0	0	1	0	0	0	0	0	0	1	0	0	1	0	0	0	0	0	0	0	0	0	0	0	0	1	0	0	0
TCGA-D7-6526	0	17.18	0	0	0	1	1	1	0	1	0	1	0	0	1	0	0	1	1	0	1	0	0	1	1	1	0	1	1	0	0	1	1	1	1	1	1	1	1	1	1	1	1	0	1	0	1	0	1
TCGA-HU-A4H6	0	21.16	1	0	1	0	1	0	1	0	1	1	1	0	0	0	0	0	0	1	1	1	0	1	0	1	0	0	0	0	0	0	0	1	0	0	0	0	0	1	0	1	1	0	0	1	1	1	1
TCGA-VQ-A925	1	4.53	0	0	1	0	0	1	0	0	1	1	1	0	0	0	0	1	0	1	1	0	1	0	1	1	0	0	1	0	0	0	0	1	0	0	1	0	0	1	1	1	1	0	1	1	0	1	0
TCGA-RD-A8N0	0	40.6	1	1	0	0	0	0	1	0	0	1	1	0	1	0	1	1	0	0	0	0	1	0	0	0	0	1	0	1	1	0	1	1	0	0	0	1	1	1	0	0	0	1	1	1	0	0	0
TCGA-VQ-A8DU	1	5.45	0	1	1	1	1	1	1	0	1	0	0	1	0	1	0	0	1	0	1	0	0	1	1	0	1	1	0	1	0	1	0	1	1	1	0	1	1	1	1	0	1	0	1	1	1	0	1
TCGA-SW-A7EB	0	5.78	0	1	1	1	1	0	0	1	0	0	1	1	0	0	0	0	1	0	1	1	0	1	0	1	0	1	0	0	1	0	1	1	1	0	1	1	1	1	1	0	0	1	1	1	1	0	1
TCGA-VQ-A8E2	0	43.33	0	1	0	1	0	0	0	1	0	0	0	1	1	1	1	1	1	1	1	0	0	1	1	1	1	1	1	1	0	0	0	1	1	1	0	1	1	1	1	1	1	1	1	1	1	1	1
TCGA-RD-A8MW	1	37.88	1	0	0	1	0	1	0	1	1	0	0	1	1	1	1	1	0	0	0	1	1	1	1	0	0	1	0	1	0	0	1	1	1	0	1	1	0	0	0	0	0	1	1	1	0	0	1
TCGA-D7-8575	1	18.2	0	0	1	0	1	1	0	0	0	1	1	1	0	0	0	1	1	0	0	1	1	1	0	0	1	1	0	0	0	0	1	1	0	0	1	0	0	1	1	0	0	1	1	1	1	1	0
TCGA-BR-6802	0	30.88	0	0	0	1	1	0	0	0	1	1	1	1	0	1	0	0	0	1	0	0	0	0	0	1	0	1	1	0	1	1	1	0	1	1	0	0	1	1	1	1	0	1	0	0	0	0	0
TCGA-HU-A4HD	0	33.38	0	1	1	0	0	1	0	1	0	0	0	0	0	0	0	1	1	0	0	0	1	1	0	1	1	1	1	0	1	0	1	1	1	1	0	1	0	1	0	1	1	1	1	0	1	0	1
TCGA-R5-A7ZE	1	18.2	0	1	0	1	0	0	0	1	1	1	0	0	0	0	0	0	1	1	0	0	0	1	1	1	0	0	1	1	1	1	0	1	1	1	0	0	1	1	0	1	1	0	1	0	1	1	1
TCGA-VQ-A91X	1	9.49	0	0	1	0	0	1	0	0	0	0	0	1	0	0	0	0	1	0	0	0	0	1	0	1	1	1	1	1	0	1	0	1	0	1	1	0	1	1	1	1	1	0	1	0	1	1	1
TCGA-R5-A805	1	9.23	0	1	1	0	0	1	1	1	1	1	1	0	1	1	0	1	1	0	1	1	1	1	0	1	1	0	0	1	0	1	1	1	1	0	1	0	1	0	0	0	1	1	1	0	1	1	1
TCGA-VQ-AA64	1	18.4	0	0	0	0	0	1	1	1	1	1	1	0	1	1	1	1	1	1	1	1	0	1	1	0	0	1	0	0	0	0	0	1	0	0	1	0	1	0	0	0	0	1	1	1	1	1	0
TCGA-VQ-A8E0	1	18.46	0	0	1	1	0	0	0	0	1	1	0	0	0	0	0	0	1	1	1	1	1	1	0	0	0	0	0	0	0	0	1	1	1	0	1	1	0	1	0	0	1	1	0	1	1	1	1
TCGA-VQ-A94T	1	11.24	1	0	1	0	1	1	0	0	1	1	1	0	1	0	0	0	0	1	0	1	0	1	0	1	1	0	0	0	0	0	0	1	1	0	0	0	0	0	0	0	1	1	0	0	1	1	1
TCGA-BR-8361	0	31.08	0	0	0	0	0	0	0	0	0	0	1	0	0	0	1	0	0	1	1	0	0	0	1	0	0	0	1	1	0	1	0	0	0	0	1	1	1	1	0	1	0	0	0	1	0	0	0
TCGA-HU-A4GX	0	20.24	0	0	1	0	0	0	0	0	0	0	1	0	0	0	0	0	0	1	1	0	0	0	0	0	0	0	0	0	0	1	1	0	0	0	0	0	1	0	0	1	0	0	0	1	0	0	0
TCGA-BR-A4PF	0	1.15	0	0	1	1	0	1	0	0	1	0	1	0	0	1	0	0	0	0	0	0	0	1	1	0	0	0	1	0	0	1	1	1	0	1	0	0	1	0	1	1	0	0	0	1	0	1	0
TCGA-VQ-AA6J	0	27.53	0	0	0	0	0	1	0	1	1	0	1	0	0	1	0	1	0	1	0	1	1	0	0	0	0	1	1	0	0	1	1	0	1	1	0	0	1	0	0	1	0	0	0	0	0	1	0
TCGA-BR-8683	1	9.86	1	1	1	1	1	0	0	1	1	1	0	1	1	1	1	1	0	0	1	1	1	0	0	0	1	1	1	1	1	1	0	1	0	1	1	1	1	1	0	1	0	1	1	0	1	0	1
TCGA-BR-8687	1	8.21	0	0	1	1	0	1	0	0	0	0	1	0	0	0	1	0	0	0	1	1	1	1	1	1	0	0	0	1	0	0	0	0	1	0	1	1	0	1	1	0	1	0	0	1	0	1	1
TCGA-BR-8364	0	22.17	1	1	1	0	1	1	1	1	0	1	1	1	1	0	1	1	0	0	0	1	1	0	1	0	1	1	0	1	1	0	1	0	0	0	0	1	0	0	0	0	1	1	0	0	0	0	0
TCGA-HU-8608	0	21.06	1	0	0	0	0	0	0	0	1	0	0	0	0	1	0	0	0	0	0	0	0	0	0	0	0	0	0	0	0	0	1	0	0	0	0	0	1	0	0	0	0	0	0	0	0	0	0
TCGA-HU-A4GC	0	3.25	1	1	0	1	1	1	0	0	0	0	1	0	0	1	1	0	1	1	1	0	1	1	1	0	0	0	1	0	0	0	0	0	1	1	0	0	0	1	1	1	1	1	1	0	1	1	1
TCGA-VQ-A91D	1	11.7	0	0	0	0	0	1	1	0	0	0	0	0	0	1	0	1	1	1	1	1	1	0	1	1	0	0	1	0	0	1	1	0	0	0	1	0	1	0	1	1	0	1	0	1	0	1	0
TCGA-BR-8058	0	37.22	0	1	1	0	1	0	1	1	0	1	1	0	1	0	1	0	0	0	0	1	0	1	1	0	0	0	0	0	0	1	1	0	0	0	0	1	0	0	0	0	1	0	1	0	1	0	0
TCGA-BR-8384	0	3.71	1	1	1	0	1	1	1	1	0	0	0	1	1	0	1	1	0	0	0	1	1	0	0	0	1	1	0	1	1	0	0	0	0	0	1	0	0	1	0	0	0	1	0	0	0	0	1
TCGA-BR-A4IV	1	28.55	1	1	0	0	1	1	1	1	0	0	0	0	1	1	1	1	0	0	1	1	1	0	0	1	1	1	0	1	1	0	0	0	0	0	1	1	0	1	0	0	1	1	1	1	0	1	0
TCGA-BR-8296	1	15.57	1	1	0	0	1	1	0	0	0	0	0	1	1	0	1	0	1	0	0	1	1	1	0	1	1	1	0	1	1	0	1	1	1	0	1	0	0	1	1	0	0	1	1	1	1	1	1
TCGA-BR-8590	1	9.33	1	1	0	0	0	1	1	1	0	0	0	1	1	1	1	1	1	1	0	1	1	0	1	0	1	1	1	1	1	0	1	1	1	0	1	1	1	1	0	1	1	1	1	1	1	0	1
TCGA-D7-8574	0	17.18	0	1	1	0	1	0	1	1	0	0	0	1	0	0	1	0	0	0	0	1	0	0	1	0	1	1	0	0	0	1	1	0	0	0	1	1	1	0	0	0	0	0	0	0	1	0	0
TCGA-D7-6818	1	12.35	0	0	1	1	1	1	1	1	1	0	0	0	0	1	1	1	1	1	0	1	0	1	1	0	1	0	1	1	1	1	0	1	0	1	0	1	0	1	0	1	0	0	0	1	1	1	1
TCGA-D7-5577	1	25.69	0	0	0	1	1	0	0	0	0	1	1	1	1	1	0	0	1	0	0	0	1	1	1	1	0	1	0	0	1	1	1	1	1	1	0	1	0	1	1	0	1	0	0	0	0	1	1
TCGA-HU-A4H2	0	12.94	0	0	1	1	0	0	0	0	0	1	1	0	0	0	0	0	1	1	1	0	0	0	0	0	0	0	1	0	0	1	0	1	1	1	0	1	0	1	1	1	0	0	1	0	1	0	1
TCGA-D7-A4YU	0	16.43	0	0	1	1	0	0	1	1	0	1	0	0	0	0	1	1	0	1	1	0	0	1	0	0	1	1	1	1	0	1	1	0	1	0	1	0	1	1	0	1	0	1	0	1	1	1	0
TCGA-BR-8677	0	26.71	1	1	1	0	0	0	1	1	1	0	0	0	0	1	1	1	0	0	0	1	1	0	0	0	1	1	0	0	0	1	0	0	1	1	0	1	1	0	1	0	1	1	0	0	0	0	0
TCGA-BR-A4J8	0	13.5	1	1	1	0	1	1	1	0	0	1	0	0	1	0	1	1	0	0	1	0	1	1	0	0	1	0	0	0	0	0	1	0	1	1	0	1	0	1	1	1	0	1	0	0	0	1	0
TCGA-BR-A44U	1	13.86	1	0	0	0	0	1	1	0	0	0	0	0	1	1	1	0	1	1	0	0	0	1	1	0	0	0	1	1	0	1	1	0	0	1	0	1	1	0	0	1	0	0	0	0	0	0	0
TCGA-VQ-A91A	0	39.42	1	0	1	0	1	1	1	0	1	1	0	0	0	1	0	1	1	1	1	1	1	0	0	0	1	1	1	0	0	0	0	1	0	1	0	1	1	1	0	1	1	0	0	1	0	1	1
TCGA-BR-8676	0	7.52	0	0	0	1	1	0	0	0	0	0	0	1	1	0	0	0	0	0	0	0	0	1	0	1	0	0	0	0	1	0	0	0	0	0	0	0	0	0	1	0	0	0	0	1	1	0	1
TCGA-VQ-A8PE	1	22.17	1	1	0	1	0	1	0	1	0	1	1	0	0	1	0	0	1	1	1	0	0	1	1	0	0	0	1	0	0	0	0	1	1	1	1	0	1	1	0	0	1	0	0	1	1	1	1
TCGA-BR-8367	1	26.31	1	1	1	1	1	1	1	1	0	0	1	1	1	0	1	1	1	0	0	1	1	1	0	1	1	1	1	1	1	0	1	1	0	0	1	1	1	1	1	1	0	1	1	1	0	1	1
TCGA-VQ-A8DT	0	48.75	0	0	0	0	1	0	0	0	0	1	1	1	1	0	0	0	1	1	1	0	0	1	1	1	0	1	1	0	0	0	1	1	0	1	1	0	0	1	0	1	1	1	1	1	1	0	1
TCGA-D7-8570	0	24.7	0	0	1	0	0	0	0	0	0	1	0	0	0	1	0	0	0	0	1	0	1	0	0	0	0	1	0	1	0	0	1	0	1	0	0	1	1	0	0	0	0	0	1	1	0	0	0
TCGA-BR-8369	0	14.03	1	1	1	0	1	1	1	0	0	0	1	1	1	0	1	1	0	0	1	1	1	0	0	1	1	1	0	1	0	1	0	1	0	1	1	0	0	1	1	0	0	1	1	1	1	1	1
TCGA-BR-8690	0	10.68	0	1	1	1	1	1	0	1	0	0	0	1	1	1	1	0	1	1	1	0	0	0	1	1	0	1	1	0	1	0	1	1	1	1	0	1	1	1	0	1	1	0	1	0	1	1	1
TCGA-VQ-A8PF	1	2.5	0	0	1	0	1	0	0	0	1	1	0	1	1	0	0	1	0	0	0	1	1	0	1	1	1	1	0	1	0	0	0	1	0	0	0	0	0	0	0	0	0	0	1	0	1	0	0
TCGA-F1-A448	0	21.25	1	0	1	0	0	0	0	0	1	0	1	1	0	1	1	0	0	1	0	0	1	0	1	1	0	0	1	0	0	1	0	0	0	1	0	0	1	0	0	1	1	1	0	0	0	0	0
TCGA-D7-8576	1	14.65	0	1	1	0	1	0	0	0	1	0	1	0	1	0	0	0	0	0	0	0	1	1	1	1	0	1	1	0	0	0	0	0	1	0	1	0	0	0	1	0	1	0	1	1	0	1	1
TCGA-BR-6705	1	25.59	1	1	0	1	0	1	1	1	1	0	0	1	0	1	1	1	0	0	0	1	1	0	0	1	1	1	0	1	1	0	0	0	0	0	0	1	1	0	0	0	1	0	0	0	0	1	0
TCGA-VQ-A8PK	1	17.84	1	1	1	0	0	0	1	0	0	1	1	0	1	1	0	1	1	0	1	1	1	1	0	1	0	0	0	1	0	1	0	1	1	0	1	0	1	0	0	0	1	1	0	0	1	1	1
TCGA-BR-8371	1	11.79	1	1	1	1	1	1	1	1	0	0	0	1	1	0	1	1	0	0	0	1	1	0	1	1	1	1	0	1	1	0	0	0	0	0	0	0	0	0	0	0	1	1	1	0	0	0	0
TCGA-BR-6709	1	12.16	1	0	1	1	1	1	1	1	0	0	0	1	1	1	0	1	1	1	0	0	0	1	0	0	1	0	0	0	1	1	1	1	1	1	0	0	0	0	1	0	1	1	0	0	1	1	1
TCGA-VQ-A8PH	1	12.78	0	1	0	1	1	1	0	1	1	0	0	0	0	0	0	1	1	1	1	0	1	1	1	0	0	0	1	1	0	1	0	1	1	1	0	0	1	1	0	1	0	0	0	0	1	1	1
TCGA-D7-A6EY	1	11.43	0	0	0	1	0	0	1	0	0	0	0	0	1	1	1	1	1	1	0	1	0	0	0	0	1	0	1	1	1	1	1	0	0	0	1	1	0	0	0	1	1	1	1	0	1	1	0
TCGA-BR-A4QL	1	16.13	0	0	0	0	0	0	0	0	0	1	0	1	1	1	0	0	1	1	0	0	1	0	1	0	0	1	1	0	0	1	1	0	0	1	1	0	1	1	0	1	0	1	0	0	1	1	0
TCGA-BR-7723	1	28.71	1	1	1	1	1	1	1	1	1	0	0	1	1	1	1	1	0	0	0	1	1	0	1	0	1	0	0	0	1	0	0	1	1	1	1	1	1	0	1	0	0	0	0	0	1	1	1
TCGA-IN-A7NU	0	11.7	1	1	0	1	1	1	0	0	0	1	1	1	0	1	0	0	0	1	1	1	0	0	1	1	0	1	1	0	1	0	0	1	1	0	0	0	1	0	1	0	1	1	0	0	0	1	0
TCGA-VQ-A927	1	6.57	1	0	1	1	0	0	0	1	1	1	1	0	1	0	1	1	0	0	0	0	1	0	0	1	0	1	0	1	0	1	1	0	0	0	0	0	1	1	0	0	1	0	0	0	0	1	0
TCGA-HF-A5NB	0	30.49	0	0	1	0	0	0	0	0	0	1	1	0	1	1	0	0	0	1	1	1	0	1	0	0	0	0	1	0	0	1	1	0	0	1	1	0	1	0	0	1	0	0	0	1	0	1	0
TCGA-BR-8485	0	9.2	1	1	1	1	1	0	0	1	1	0	1	0	1	1	0	0	1	1	1	0	0	1	1	0	0	0	0	1	1	1	1	1	1	1	1	1	1	1	1	0	1	0	1	0	1	0	1
TCGA-FP-7998	0	22.27	1	0	1	0	0	0	1	1	0	0	0	1	1	0	1	1	0	0	0	1	1	0	0	0	1	0	0	1	0	0	1	0	0	0	0	0	0	0	0	0	0	0	0	1	0	0	0
TCGA-BR-8372	0	31.24	0	0	1	0	1	0	1	0	0	0	1	1	1	1	0	1	1	1	0	1	0	0	1	1	1	1	1	0	1	1	1	1	0	0	1	0	1	0	1	1	0	1	1	1	0	0	1
TCGA-HU-A4H3	0	28.98	0	0	0	1	0	0	1	0	0	1	1	0	0	1	0	0	0	1	1	1	0	0	0	1	0	0	1	0	1	0	0	0	0	1	1	0	1	1	0	1	0	0	1	1	0	1	0
TCGA-BR-8382	1	25.03	0	0	0	1	1	1	1	0	1	1	0	1	1	1	0	0	1	1	0	1	0	0	1	0	0	1	1	0	1	1	0	1	1	1	1	1	1	1	1	1	0	1	0	0	0	0	0
TCGA-B7-A5TI	0	19.55	1	0	1	0	0	0	0	1	1	1	1	0	0	1	0	0	0	1	1	1	0	1	1	0	0	0	0	0	1	0	0	0	0	1	0	1	1	0	0	1	1	0	0	1	0	1	1
TCGA-BR-8591	0	28.12	1	0	0	0	0	1	1	1	1	1	0	0	1	1	1	1	0	1	1	1	1	0	1	1	1	1	1	1	0	1	0	0	0	1	0	1	1	0	1	1	0	1	0	1	0	1	0
TCGA-BR-8297	0	7.39	1	0	1	0	1	1	1	1	0	0	0	1	1	0	1	1	1	1	1	1	1	0	0	1	1	1	1	1	1	0	0	0	0	0	0	1	0	0	0	1	1	1	0	0	1	0	1
TCGA-VQ-AA6K	1	12.42	1	1	1	0	0	0	0	1	0	1	1	1	0	0	1	0	0	1	1	1	0	1	1	1	1	1	0	1	1	0	1	0	0	1	0	0	1	0	1	0	1	0	1	1	0	1	0
TCGA-BR-8284	1	8.05	0	1	1	1	1	1	1	0	1	0	1	1	1	1	1	1	1	0	1	1	1	0	1	1	1	1	0	1	1	1	1	1	0	1	0	1	0	1	0	0	0	1	1	0	1	0	1
TCGA-VQ-AA68	0	43.63	1	0	1	0	0	0	0	0	0	1	1	0	0	0	0	0	0	1	0	0	0	0	1	1	0	0	1	0	0	0	1	0	0	0	0	0	0	0	0	1	0	1	0	0	0	0	0
TCGA-BR-8080	1	9.59	1	0	1	0	0	1	1	0	1	0	1	0	1	1	1	1	0	1	1	1	1	1	1	0	1	0	1	0	1	0	1	1	1	1	1	1	0	1	0	0	1	1	1	0	0	0	0
TCGA-VQ-A94O	1	21.02	0	0	1	1	0	0	0	1	1	0	1	1	1	0	0	1	1	1	1	0	1	1	1	0	0	1	0	0	0	0	0	1	1	1	1	1	0	1	1	1	1	0	1	1	1	1	1
TCGA-VQ-AA6A	0	38.9	0	1	1	0	0	0	1	0	0	1	1	0	1	0	0	1	1	0	1	0	0	1	1	0	0	0	1	1	0	0	0	1	1	0	1	1	0	1	1	1	1	1	0	1	1	0	1
TCGA-HU-A4GJ	0	21.35	0	0	1	1	1	0	1	0	0	0	1	0	0	0	1	1	0	0	0	0	0	0	0	0	0	0	0	1	1	0	1	0	0	0	0	1	1	0	0	0	0	0	0	1	0	1	0
TCGA-HU-A4H0	0	2.1	0	0	0	0	0	1	0	0	0	0	1	0	0	0	0	0	0	0	0	1	0	0	1	0	0	0	1	0	0	0	1	0	1	1	0	0	0	0	0	0	0	0	1	0	0	1	0
TCGA-VQ-A8PD	1	16.29	1	1	0	0	0	0	0	1	1	1	1	0	0	0	1	1	0	1	0	1	0	0	0	1	1	0	0	1	1	0	1	0	0	0	0	0	1	0	1	1	1	0	0	0	0	0	0
TCGA-VQ-A91Y	1	9.72	1	0	0	0	0	1	1	1	0	1	0	1	1	1	1	1	1	0	0	1	1	0	1	0	1	1	0	1	1	0	0	1	0	1	1	1	0	1	1	0	0	1	0	0	1	1	0
TCGA-BR-A4CS	1	1.48	0	1	1	0	1	0	0	0	1	0	0	0	1	1	1	1	0	0	0	1	0	1	0	0	1	0	0	0	1	0	0	1	1	0	1	0	1	0	0	0	0	0	1	0	1	1	1
TCGA-FP-7916	1	14.06	0	1	0	1	0	0	1	1	1	0	0	0	1	0	1	0	0	0	0	0	1	0	1	0	1	0	0	1	0	0	1	0	1	0	1	1	0	0	1	0	1	1	1	0	0	1	0
TCGA-BR-8380	1	15.34	1	1	1	1	1	1	1	1	0	0	0	1	1	0	1	1	0	0	0	1	1	0	0	1	1	1	0	1	1	1	0	0	0	0	0	1	0	1	0	1	0	1	0	0	0	0	1
TCGA-R5-A7ZR	1	6.08	1	1	0	1	1	1	0	0	1	1	1	1	1	0	0	0	1	0	1	0	0	1	1	0	0	0	0	0	1	1	0	0	1	1	1	0	1	1	1	0	1	1	1	1	1	1	1
TCGA-CD-8529	0	12.29	1	1	1	1	1	1	1	1	1	1	1	0	0	1	1	1	1	0	1	1	1	0	0	1	1	0	0	1	0	0	1	1	0	0	0	1	1	0	0	0	1	0	1	0	1	0	0
TCGA-CG-5719	0	1.02	1	1	0	1	1	1	1	1	1	1	1	0	0	1	1	1	0	0	1	1	0	1	1	0	0	0	0	1	1	1	0	0	0	0	0	1	0	0	0	0	1	1	0	0	0	0	0
TCGA-VQ-A8E7	0	37.39	1	0	0	0	0	1	0	1	1	1	1	0	0	1	0	1	0	1	1	0	0	1	0	0	0	0	1	1	0	1	0	1	0	1	0	0	1	1	0	1	0	0	1	0	1	1	0
TCGA-R5-A7O7	0	45.63	0	1	0	1	0	0	0	0	1	1	1	1	1	0	0	0	1	0	1	0	1	0	1	0	0	1	1	1	1	0	1	1	0	1	0	0	1	1	1	0	1	0	1	1	1	1	1
TCGA-CG-4301	0	3.02	1	1	1	0	0	0	1	1	1	0	1	0	0	1	1	1	1	0	0	1	0	1	1	1	0	0	0	1	0	0	1	1	0	1	0	1	0	0	0	0	1	0	0	1	0	0	0
TCGA-VQ-A8PP	1	23.39	0	0	1	0	0	0	1	1	0	1	1	0	1	1	0	1	1	1	0	1	1	0	1	0	1	0	1	0	0	0	0	0	0	0	0	0	1	0	0	1	0	0	1	1	0	1	0
TCGA-CG-5721	0	6.01	0	0	1	1	1	0	1	0	1	1	0	1	0	1	0	0	0	1	0	0	0	1	1	1	0	0	0	0	1	1	1	0	0	0	0	1	1	0	1	0	0	0	0	0	0	0	0
TCGA-R5-A7ZI	0	74.47	0	0	0	1	1	1	0	0	1	0	0	1	0	0	0	0	1	0	1	0	1	0	0	0	0	1	0	0	1	0	0	0	1	0	0	0	0	0	1	0	0	0	1	0	0	0	1
TCGA-BR-7717	1	18.13	1	1	0	1	1	0	1	0	1	1	0	1	0	1	1	1	1	1	1	0	1	1	1	0	0	1	1	1	1	1	0	1	1	1	0	1	1	0	1	1	0	1	1	0	0	1	1
TCGA-VQ-A922	1	9.03	1	0	0	1	0	1	0	1	1	1	0	1	0	1	0	0	1	0	1	0	1	0	1	0	0	1	1	1	0	1	0	1	1	0	1	1	1	1	1	1	1	1	1	1	1	1	1
TCGA-R5-A7ZF	1	8.51	0	0	0	1	1	0	0	1	0	1	1	1	1	0	0	1	1	0	0	0	0	0	0	1	0	1	0	0	1	1	0	1	1	1	1	1	0	1	1	0	1	0	1	0	1	0	1
TCGA-CG-4460	1	21.98	0	0	0	1	0	1	0	1	0	0	1	0	0	1	0	0	1	1	0	0	0	1	1	1	1	1	1	1	0	0	1	1	0	0	1	1	1	1	0	0	0	1	1	0	1	1	1
TCGA-VQ-A8PQ	1	15.64	1	1	1	1	1	0	1	1	0	0	0	1	1	0	1	0	0	0	0	1	1	0	0	0	0	1	0	1	0	1	1	1	1	0	1	0	1	1	1	0	1	1	1	1	0	1	1
TCGA-CG-4306	1	1.02	1	0	0	0	0	0	0	1	1	1	1	0	0	1	0	0	1	1	0	1	0	1	1	1	0	0	1	0	0	1	0	0	0	0	1	1	0	0	0	1	1	0	1	1	0	0	1
TCGA-CG-4438	0	54.04	0	1	0	0	0	0	0	1	0	0	0	1	1	0	1	1	1	0	0	1	1	1	1	0	1	1	1	1	0	1	1	1	1	1	0	0	1	1	0	1	1	1	1	1	1	1	1
TCGA-VQ-A8PJ	1	2.69	0	1	1	0	0	1	0	0	1	1	1	0	1	0	0	0	1	1	1	0	0	1	1	1	0	0	0	0	0	1	0	1	1	1	0	0	0	1	1	1	1	1	1	0	1	1	1
TCGA-BR-8680	0	31.93	0	1	0	0	1	0	0	1	0	1	0	1	1	1	0	0	1	1	0	0	0	0	0	0	1	0	1	1	1	1	1	0	0	1	1	0	1	0	0	1	0	1	1	0	0	1	1
TCGA-CG-5732	1	68.99	0	1	1	1	1	1	1	0	1	1	1	1	0	0	0	1	0	0	0	0	1	0	1	0	0	0	1	0	1	1	1	0	1	1	1	0	0	0	1	1	1	0	0	0	0	0	1
TCGA-HF-7133	0	63.01	0	0	0	1	1	0	0	1	1	1	1	1	0	0	1	0	1	0	1	1	1	1	1	1	0	0	1	1	1	1	1	1	0	0	1	0	0	0	1	0	0	0	0	1	0	1	0
TCGA-CG-4469	1	7.06	0	0	1	0	0	1	0	0	1	0	1	1	0	1	0	1	1	1	1	0	0	1	0	1	1	1	1	1	0	1	0	0	1	1	0	0	1	0	1	1	1	0	1	1	0	1	0
TCGA-IN-A7NR	0	6.5	0	1	0	1	1	1	0	1	0	1	1	1	0	0	1	0	1	1	1	0	0	0	1	1	0	1	1	0	1	1	0	1	1	1	0	0	1	1	1	1	1	1	0	0	1	0	1
TCGA-VQ-A91Q	1	20.8	1	0	1	0	0	0	1	1	1	1	1	0	1	1	0	1	0	0	1	1	0	1	1	0	1	0	1	1	0	1	0	1	0	0	1	1	0	1	1	0	1	1	0	1	0	1	0
TCGA-BR-7196	0	21.88	1	1	1	0	0	1	1	1	1	0	1	1	1	1	1	1	0	0	1	1	0	0	0	0	1	0	0	1	0	0	0	0	0	0	1	1	0	0	0	0	0	1	0	0	0	0	1
TCGA-CG-5724	1	12.02	1	1	1	1	1	1	1	1	1	0	0	1	0	1	0	1	1	1	0	1	1	1	0	1	0	1	1	1	1	1	0	1	1	0	1	0	0	1	1	1	1	1	1	0	0	1	1
TCGA-BR-7957	1	9.07	1	1	0	0	1	1	1	1	0	0	1	1	1	1	1	1	0	1	0	0	1	0	1	1	1	1	1	1	1	0	1	1	0	0	0	1	0	0	0	1	0	1	1	0	1	0	0
TCGA-CG-4440	1	4.01	0	1	0	1	0	0	0	1	1	0	0	0	0	1	0	0	1	1	1	0	0	1	1	0	0	1	1	1	1	0	0	1	1	1	1	0	0	1	0	0	1	1	1	0	1	1	1
TCGA-RD-A7BT	1	8.61	0	0	0	0	0	1	0	0	0	0	1	0	0	0	1	0	1	1	0	0	0	1	0	0	1	1	0	0	0	1	1	1	1	1	1	0	1	1	1	1	0	0	1	0	1	1	1
TCGA-VQ-A928	1	5.72	1	0	1	0	0	0	0	1	1	1	1	1	1	1	1	1	0	0	1	0	0	0	0	0	1	1	0	0	1	1	0	1	0	0	0	1	0	0	1	0	1	0	1	0	0	1	1
TCGA-VQ-A91N	1	18.73	0	0	0	1	1	0	0	0	0	1	1	0	1	0	0	0	1	1	0	0	0	1	0	1	0	0	1	1	0	0	0	1	0	1	1	0	0	1	1	1	1	0	0	1	1	1	1
TCGA-CG-4465	1	9	0	0	0	1	1	0	1	1	1	1	0	1	0	1	1	0	1	0	0	0	0	1	0	1	0	0	1	0	1	1	1	1	0	1	0	1	1	1	0	0	0	0	0	1	0	1	1
TCGA-BR-8289	1	2.66	1	0	0	1	1	1	1	0	0	0	1	0	0	0	1	1	1	0	0	1	1	0	0	0	1	0	1	1	1	1	1	1	1	0	1	1	0	1	1	0	1	1	1	0	1	1	1
TCGA-VQ-A8DZ	1	13.01	0	1	0	1	0	0	0	1	1	0	0	1	1	0	0	1	1	1	1	0	1	0	1	0	0	0	1	0	1	0	0	1	1	1	0	1	1	1	1	1	1	1	1	1	1	1	1
TCGA-VQ-A8PM	1	1.87	1	1	0	1	1	0	0	1	1	0	1	1	1	0	0	1	1	0	1	0	1	1	0	1	0	0	0	1	0	0	0	1	1	0	1	1	0	1	1	1	1	1	1	0	1	0	1
TCGA-D7-A748	1	4.34	1	1	0	1	1	0	1	0	1	0	0	1	0	1	1	1	1	0	0	1	1	0	1	0	0	1	0	0	1	0	1	0	1	0	0	1	0	0	1	0	1	0	1	0	1	1	0
[truncated: 37 more columns]
